# Supplementary material for: Introducing phosphorus atoms into MoS2 nanosheets through a vapor-phase hydrothermal process for the hydrogen evolution reaction
Source: Royal Society of Chemistry journal article supplement (doi:10.1039/d4dt00272e), 2024-01-01
Supplement: d4dt00272e1.pdf [file d4dt00272e1.pdf]

## Electronic Supplementary Information (ESI)

Introducing phosphorus atoms into MoS<sub>2</sub> nanosheets through a  
vapor-phase hydrothermal process for the hydrogen evolution  
reaction

Tianxing Wu, <sup>\*a,b</sup> Hanqi Meng <sup>b</sup>

<sup>a</sup> School of Materials Science and Engineering, Hubei University of Automotive  
Technology, Shiyan, 442002, P. R. China

<sup>b</sup> Northwest Institute for Non-ferrous Metal Research, Xi'an, 710016, P. R. China

### **Corresponding Author**

\*E-mail: mybestteacher@163.com (T. Wu)

**Table S1** XRF results of the P-doped MoS<sub>2</sub>/CFC.

|                               | XRF analysis (wt. %) |      |     |
|-------------------------------|----------------------|------|-----|
|                               | Mo                   | S    | P   |
| P-doped MoS <sub>2</sub> /CFC | 29.7                 | 67.4 | 2.2 |

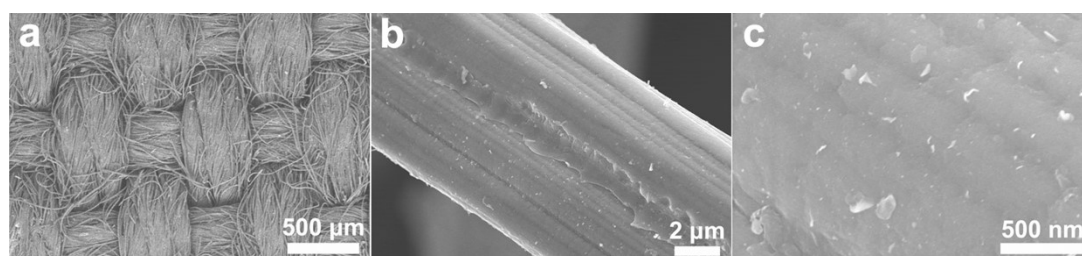

**Fig. S1** SEM image of bare CFC.

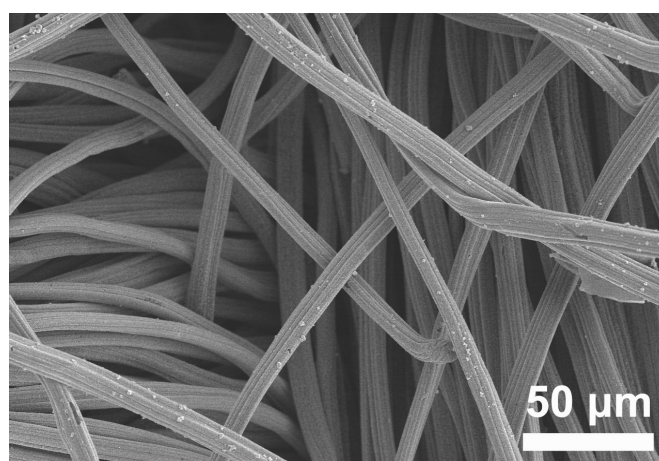

**Fig. S2** Low-magnification SEM image of MoS<sub>2</sub>/CFC.

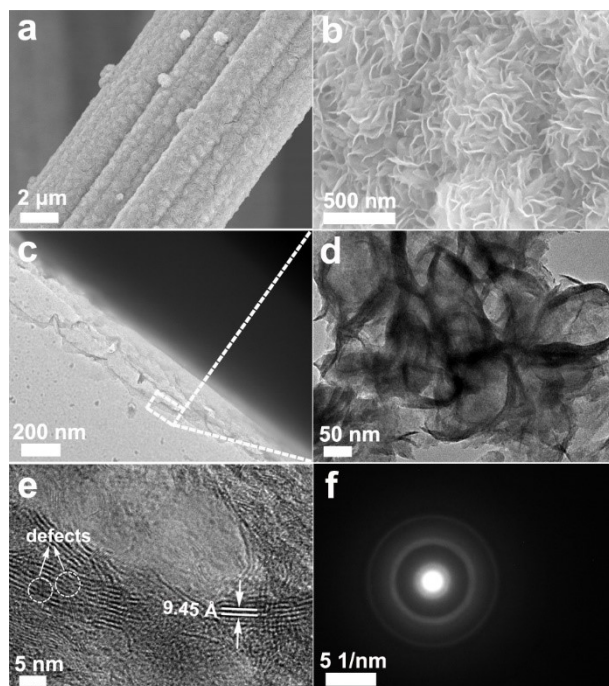

**Fig. S3** MoS<sub>2</sub>/CFC: (a) low- and (b) high-magnification SEM images; (c) TEM image of the edge of a single fiber; (d) TEM image, (e) HRTEM image and (f) the corresponding SAED pattern of the dashed rectangle area in (c).

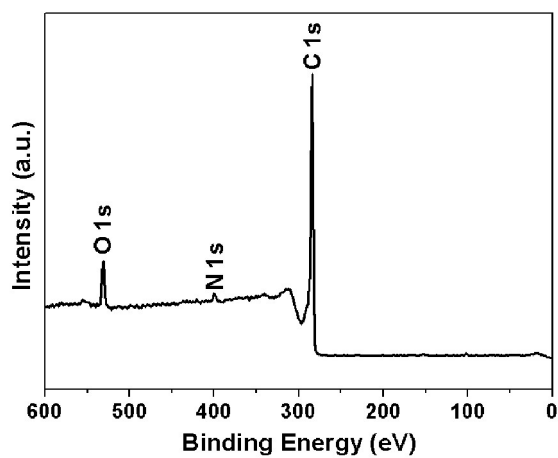

**Fig. S4** Survey XPS spectrum of CFC.

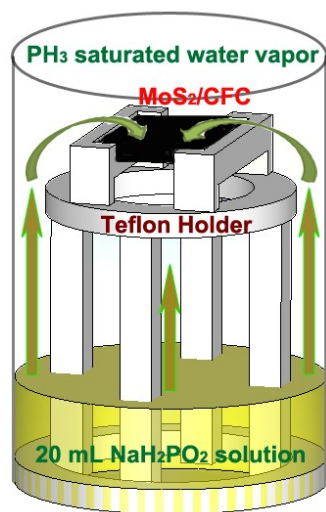

**Fig. S5** PH<sub>3</sub>-VPH experimental set up.

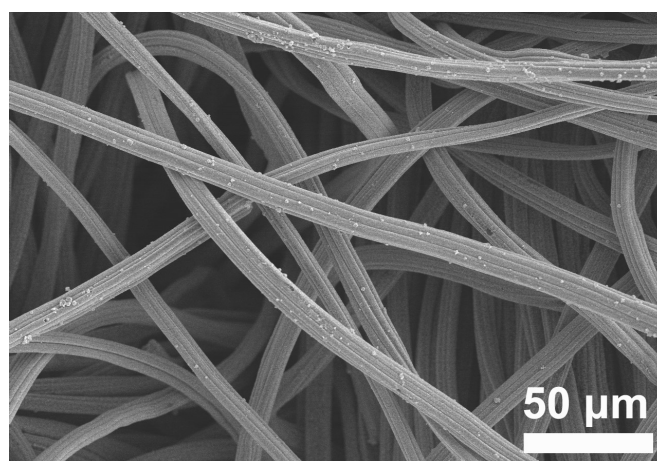

**Fig. S6** Low-magnification SEM image of P-doped MoS<sub>2</sub>/CFC.

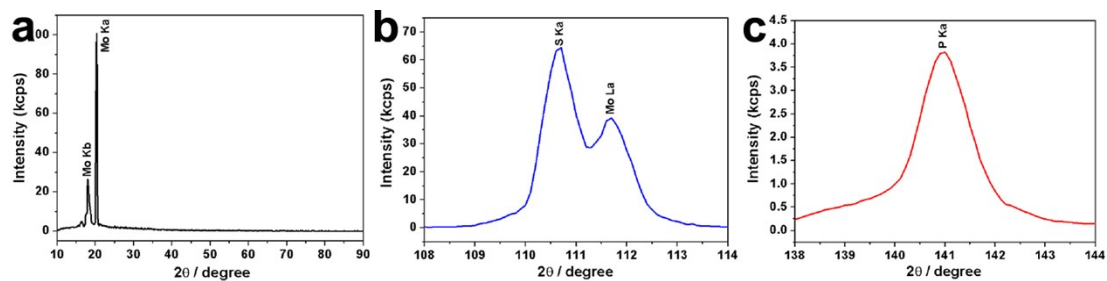

**Fig. S7** XRF patterns of P-doped MoS<sub>2</sub>/CFC with different channels: (a) Ti-U, (b) S and (c) P.

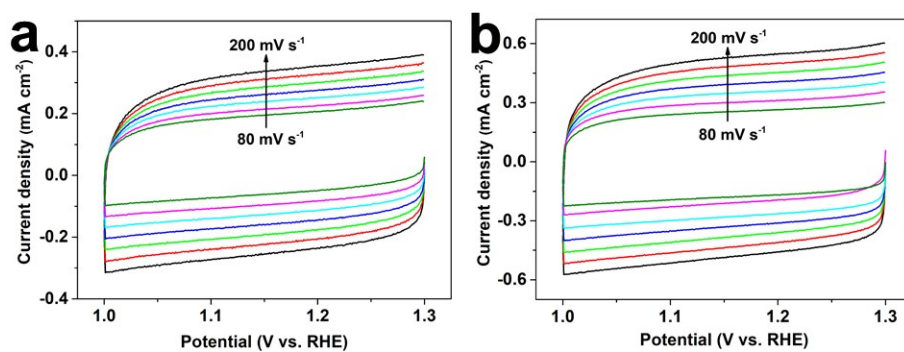

**Fig. S8** Electrochemical capacitance measurements (cyclic voltammograms from 80 to 200 mV s<sup>-1</sup>)

to determine the ECSA of (a) MoS<sub>2</sub>/CFC, and (b) P-doped MoS<sub>2</sub>/CFC, respectively.
